# Supplementary material
Source: publisher figshare collection journal article supplement (https://acs.figshare.com/ndownloader/files/4055317)
Supplement: Supplementary file 1 [file 4055317]

## Supporting Information

### Covalent Triazine Frameworks prepared from 1,3,5-tricyanobenzene

Phisan Katekomol, Jérôme Roeser, Michael Bojdys, Jens Weber and Arne Thomas

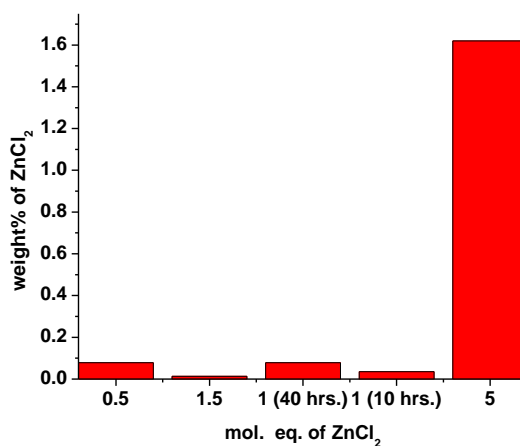

**Figure S1:** ICP measurements of materials prepared from different mol. eq. of ZnCl<sub>2</sub>.

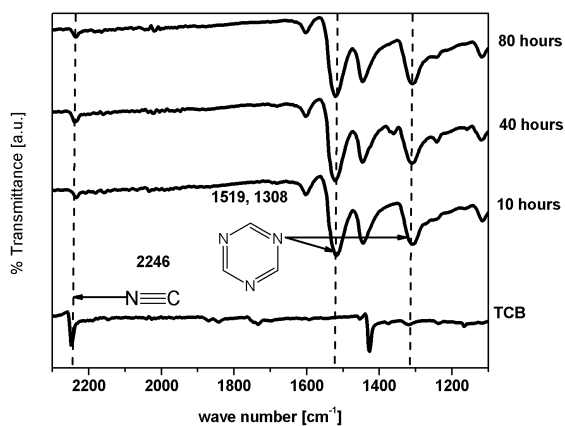

**Figure S2:** FT-IR spectra of 1,3,5-tricyanobenzene (TCB) and CTF-0 frameworks synthesized with 1 mol. eq. ZnCl<sub>2</sub> at 400 °C and various reaction times.

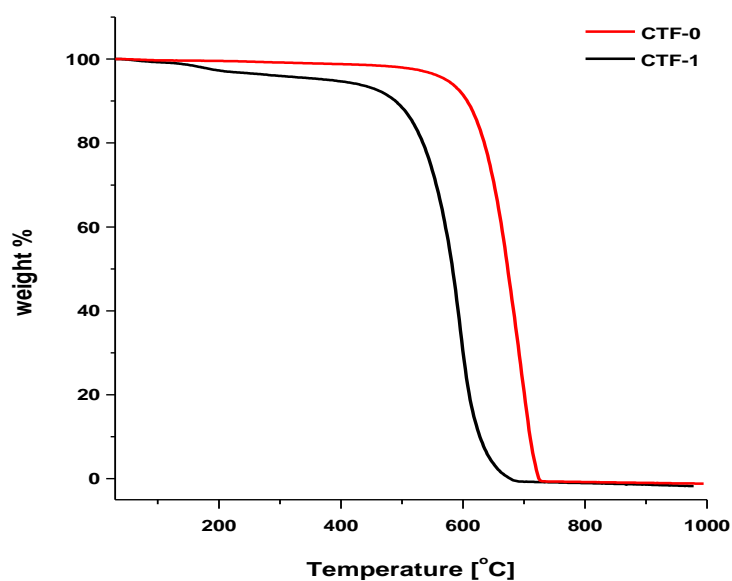

**Figure S3:** Thermogravimetric analysis of a representative framework heated under oxygen atmosphere (heating rate of 10 °K.min<sup>-1</sup>). The TGA plot of CTF-1 (black curve) is given for comparison<sup>[S1]</sup>.

**Table S1:** Elemental analysis results

| Entry            | ZnCl <sub>2</sub><br>(mol eq.) | Time<br>(h) | Temp<br>(°C) | % Eyperimental |     |      | % Theory |     |      |
|------------------|--------------------------------|-------------|--------------|----------------|-----|------|----------|-----|------|
|                  |                                |             |              | % C            | % H | % N  | % C      | % H | % N  |
| 1                | 0.5                            | 40          | 400          | 66.4           | 2.7 | 22.1 | 70.6     | 2.0 | 27.4 |
| 2                | 1                              | 10          | 400          | 66.4           | 2.6 | 22.1 | 70.6     | 2.0 | 27.4 |
| 3                | 1                              | 40          | 400          | 65.6           | 2.4 | 22.3 | 70.6     | 2.0 | 27.4 |
| 4                | 1.5                            | 40          | 400          | 65.9           | 2.5 | 22.0 | 70.6     | 2.0 | 27.4 |
| 5                | 5                              | 20/20       | 400/600      | 63.5           | 2.7 | 14.8 | 70.6     | 2.0 | 27.4 |
| 6 <sup>[a]</sup> | 1                              | 40          | 400          | 72.8           | 3.2 | 19.3 | 75.0     | 3.1 | 21.9 |

[a] This entry is the original CTF-1 framework synthesized from 1 mol. eq. of ZnCl<sub>2</sub> at 400 °C for 40 hours.<sup>[S1]</sup>

**Structural modeling:** A hexagonal unit cell (P-6) was chosen based on powder diffraction pattern with parameters  $a$ ,  $b = 7.3 \text{ \AA}$  and  $c = 3.3 \text{ \AA}$ . Computer modeling of the network and XRD peaks simulation was carried out using Materials Studio 4.3 software.

**Table S2:** Fractional atomic coordinates of CTF-0 framework calculated from Material Studio Software.

| CTF-0 framework                                                     |            |            |            |
|---------------------------------------------------------------------|------------|------------|------------|
| Hexagonal, P-6<br>$a = b = 7.3 \text{ \AA}$ , $c = 3.3 \text{ \AA}$ |            |            |            |
| atoms                                                               |            |            |            |
| C1                                                                  | 0.11222267 | 0.55611362 | 0.50000000 |
| C2                                                                  | 0.22337626 | 0.77662566 | 0.50000000 |
| C3                                                                  | 0.55947788 | 0.44051211 | 0.50000000 |
| N1                                                                  | 0.45309503 | 0.22655101 | 0.50000000 |

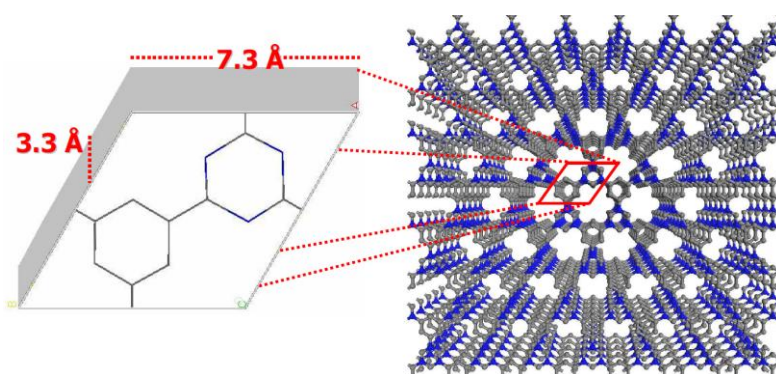

**Figure S4:** Stacking of the eclipsed CTF-0 framework with P-6 hexagonal unit cell of described dimensions.

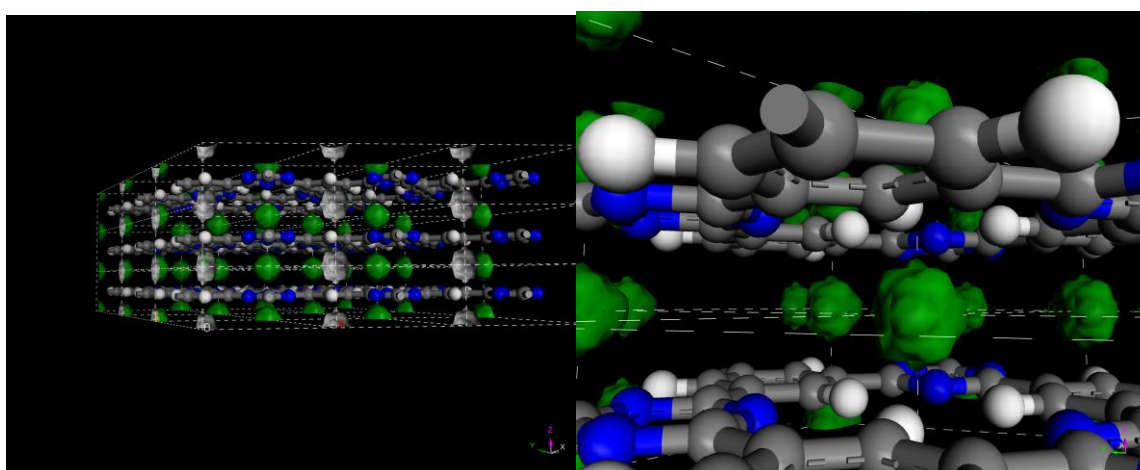

**Figure S5:** Stacking of the eclipsed CTF-0 framework with a Connolly surface (green,  $1.65 \text{ \AA}$  radius) showing the non-connected pores of the ideal structure.

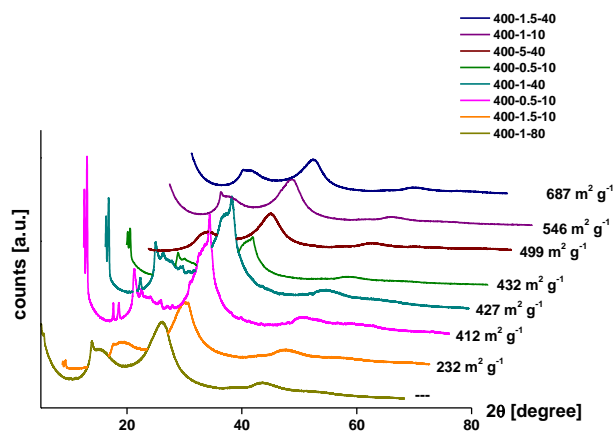

**Figure S6:** PXRD pattern of CTF-0s prepared at 400 °C with different monomer/ $\text{ZnCl}_2$  ratios and reaction times.

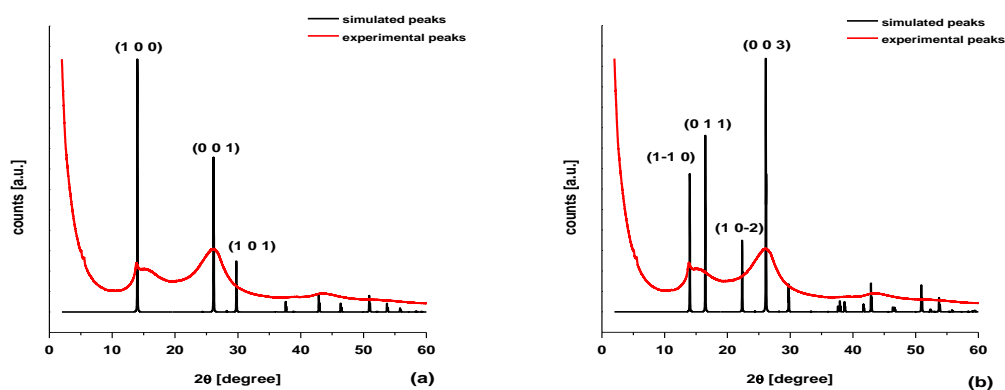

**Figure S7.** Experimental PXRD pattern of CTF-0-400-80-1 along with the simulated patterns for CTF-0 in eclipsed (a) and staggered (b) packing.

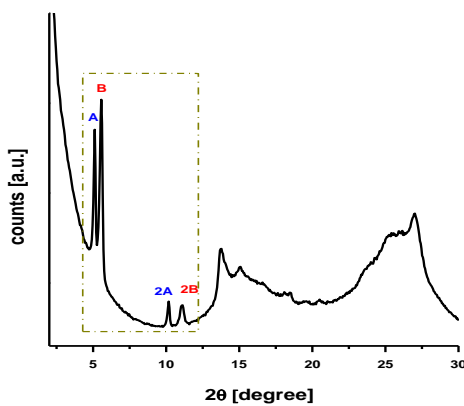

**Figure S8:** XRD diffractogram of CTF-0-400-40-1 showing additional sharp diffraction peaks at low angles.

**Table S3:** Peak positions and corresponding distances from Figure S1 based on copper K- $\alpha$  X-rays radiation with  $\lambda = 0.154$  nm.

| Peaks | 2 $\theta$<br>(degree) | Distance<br>(nm) |
|-------|------------------------|------------------|
| A     | 5.1                    | 3.5              |
| 2A    | 10.2                   | 1.7              |
| B     | 5.5                    | 3.2              |
| 2B    | 11.0                   | 1.6              |

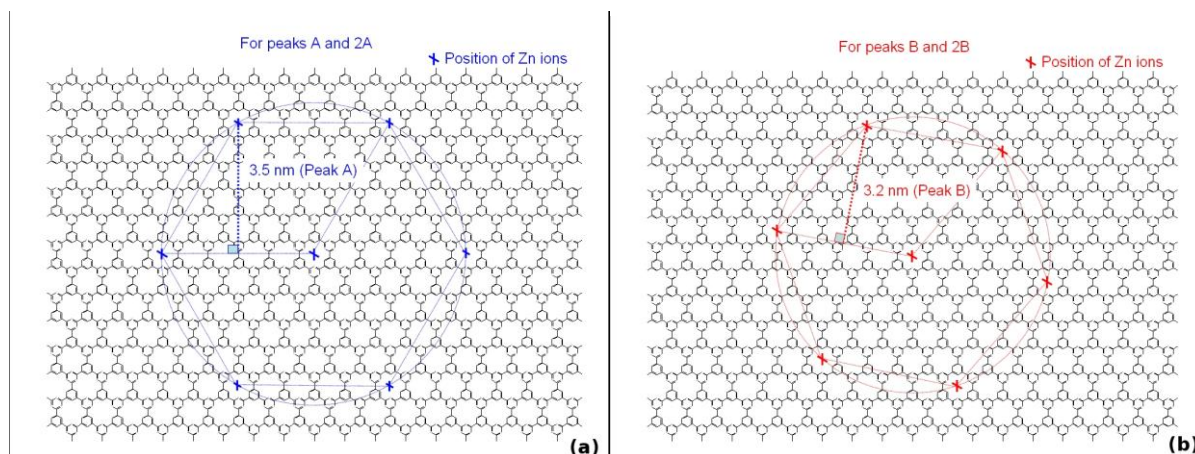

**Figure S9:** Possible crystalline phase formation by coordination with Zn resulting to the peaks set A (a) and B (b) according to Figure S3 and Table S2.

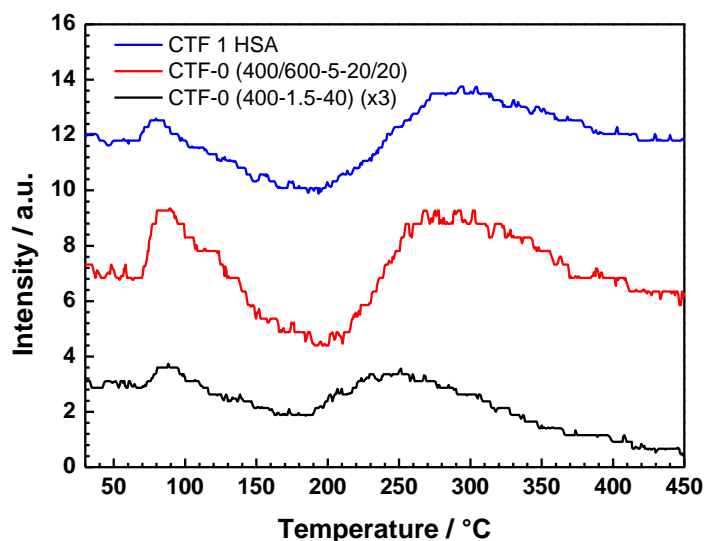

**Figure S10:** CO<sub>2</sub> Temperature-Programmed Desorption measurements of representative CTF-0 materials and of CTF-1 HSA for comparison.

[S1] Kuhn, P.; Antonietti, M.; Thomas, A. *Angew. Chem. Int. Ed.*, **2008**, 47, 3450-3453.
